# Supplementary material for: Sea Anemone Heteractis crispa Actinoporin Demonstrates In Vitro Anticancer Activities and Prevents HT-29 Colorectal Cancer Cell Migration
Source: PubMed Central journal article supplement (PMC7766076; doi:10.3390/molecules25245979), 2020-12-17
Supplement: molecules-25-05979-s001.pdf [file molecules-25-05979-s001.pdf]

# Sea Anemone *Heteractis crispata* Actinoporin Demonstrates In Vitro Anticancer Activities and Prevents HT-29 Colorectal Cancer Cell Migration

Aleksandra Kvetkina <sup>1,\*</sup>, Olesya Malyarenko <sup>1,†</sup>, Aleksandra Pavlenko <sup>1</sup>, Sergey Dyshlovoy <sup>2,3,4</sup>, Gunhild von Amsberg <sup>2,3</sup>, Svetlana Ermakova <sup>1</sup>, and Elena Leychenko <sup>1</sup>

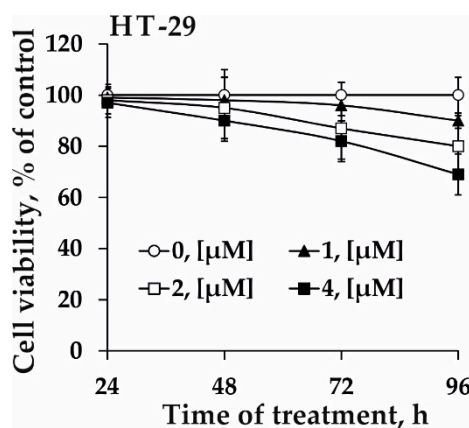

**Figure S1.** The effect of rHct-S3 on proliferation of human colorectal carcinoma HT-29 cell lines. The inhibiting activity was determined by MTS assay after 24, 48, 72, and 96 h of treatment. The results are expressed as the percentage of inhibition that produced a reduction in absorbance by rHct-S3 treatment at concentration of 1 μM, 2 μM, and 4 μM compared the non-treated cells (0 μM). Results are expressed as the mean ± standard deviation (SD).
